# Supplementary material
Source: publisher site journal article supplement (https://www.dovepress.com/article/supplementary_file/570441/570441_PALM-4085%20-%20Appendix%20-16JAN025%20%252528Clean%252529.docx)
Supplement: Supplementary file 1 [file 570441_PALM-4085%20-%20Appendix%20-16JAN025%20%252528Clean%252529.docx]

# **APPENDIX**

## **Appendix Box 1. List of medications used to identify antipsychotics**

| **Dopamine receptor antagonists** |
| --- |
| Fluphenazine (oral; long-acting injectable; short-acting injectable) |
| Haloperidol (oral; long-acting injectable; short-acting injectable) |
| Molindone (oral) |
| Perphenazine (oral) |
| Thiothixene (oral) |
| **Dopamine and serotonin receptor antagonists** |
| Chlorpromazine (oral; short-acting injectable) |
| Iloperidone (oral) |
| Loxapine (oral) |
| Lurasidone (oral) |
| Olanzapine (oral, long-acting injectable; short-acting injectable) |
| Thioridazine (oral) |
| Trifluoperazine (oral) |
| Ziprasidone (oral) |
| Ziprasidone mesylate (short-acting injectable) |
| **Dopamine, serotonin, and norepinephrine receptor antagonists** |
| Asenapine (oral) |
| Clozapine (oral) |
| Paliperidone (oral) |
| Paliperidone palmitate (long-acting injectable) |
| Risperidone (oral; long-acting injectable) |
| **Dopamine, serotonin, and opioid receptor antagonists** |
| Olanzapine-Samidorphan |
| **Dopamine partial agonists** |
| Aripiprazole (oral; long-acting injectable) |
| Aripiprazole lauroxil (long-acting injectable) |
| Brexpiprazole (oral) |
| Cariprazine (oral) |
| **Multimodal regulators** |
| Lumateperone (oral) |
| Quetiapine (oral) |

**Appendix Table 1. List of variables included in the multivariate logistic regression assessing the association between prescriber- and patient-level characteristics and adherence to any AP**

| **Index Prescriber Characteristics** | **Patient Demographics** | **Clinical and Treatment Characteristics** |
| --- | --- | --- |
| **LAI Prescribing Pattern**   - Non-LAI Prescriber (Reference) - Low-LAI Prescriber - Intermediate- Prescriber - High-LAI Prescriber   **Specialty**   - Psychiatrist (Reference) - Psychiatric Nurse Practitioner - Primary Care Provider - Other   **Practice Setting**   - Urban (Reference) - Rural   **Practice Location Social Vulnerability Index (SVI)** | **Age at Index Date**  **Female**  **Race/Ethnicity**   - White (Reference) - Black or African American - Hispanic or Latino - Asian - Other or Unknown   **Region**   - West (Reference) - South - Northeast - Midwest   **Payer Type**   - Medicaid (Reference) - Medicare Advantage - Commercial - Missing | **Quan-CCI**  **DSM-5-TR Comorbidities**   - Substance-Related and Addictive Disorders - Depressive Disorders - Anxiety Disorders - Sleep-Wake Disorders - Trauma- and Stressor-Related Disorders - Neurodevelopmental Disorders   **Index AP Type**   - Any Oral AP (Reference) - Any LAI   **Number of Unique AP Agents in Baseline**  **≥1 Schizophrenia-Related OP Visit in Baseline**  **≥1 Schizophrenia-Related ED Visit in Baseline** |
